# Supplementary material for: Diagnostic and management of life-threatening Adult-Onset Still Disease: a French nationwide multicenter study and systematic literature review
Source: PubMed Central journal article supplement (PMC5896069; doi:10.1186/s13054-018-2012-2), 2018-04-11
Supplement: 13054_2018_2012_MOESM1_ESM.pdf [file 13054_2018_2012_MOESM1_ESM.pdf]

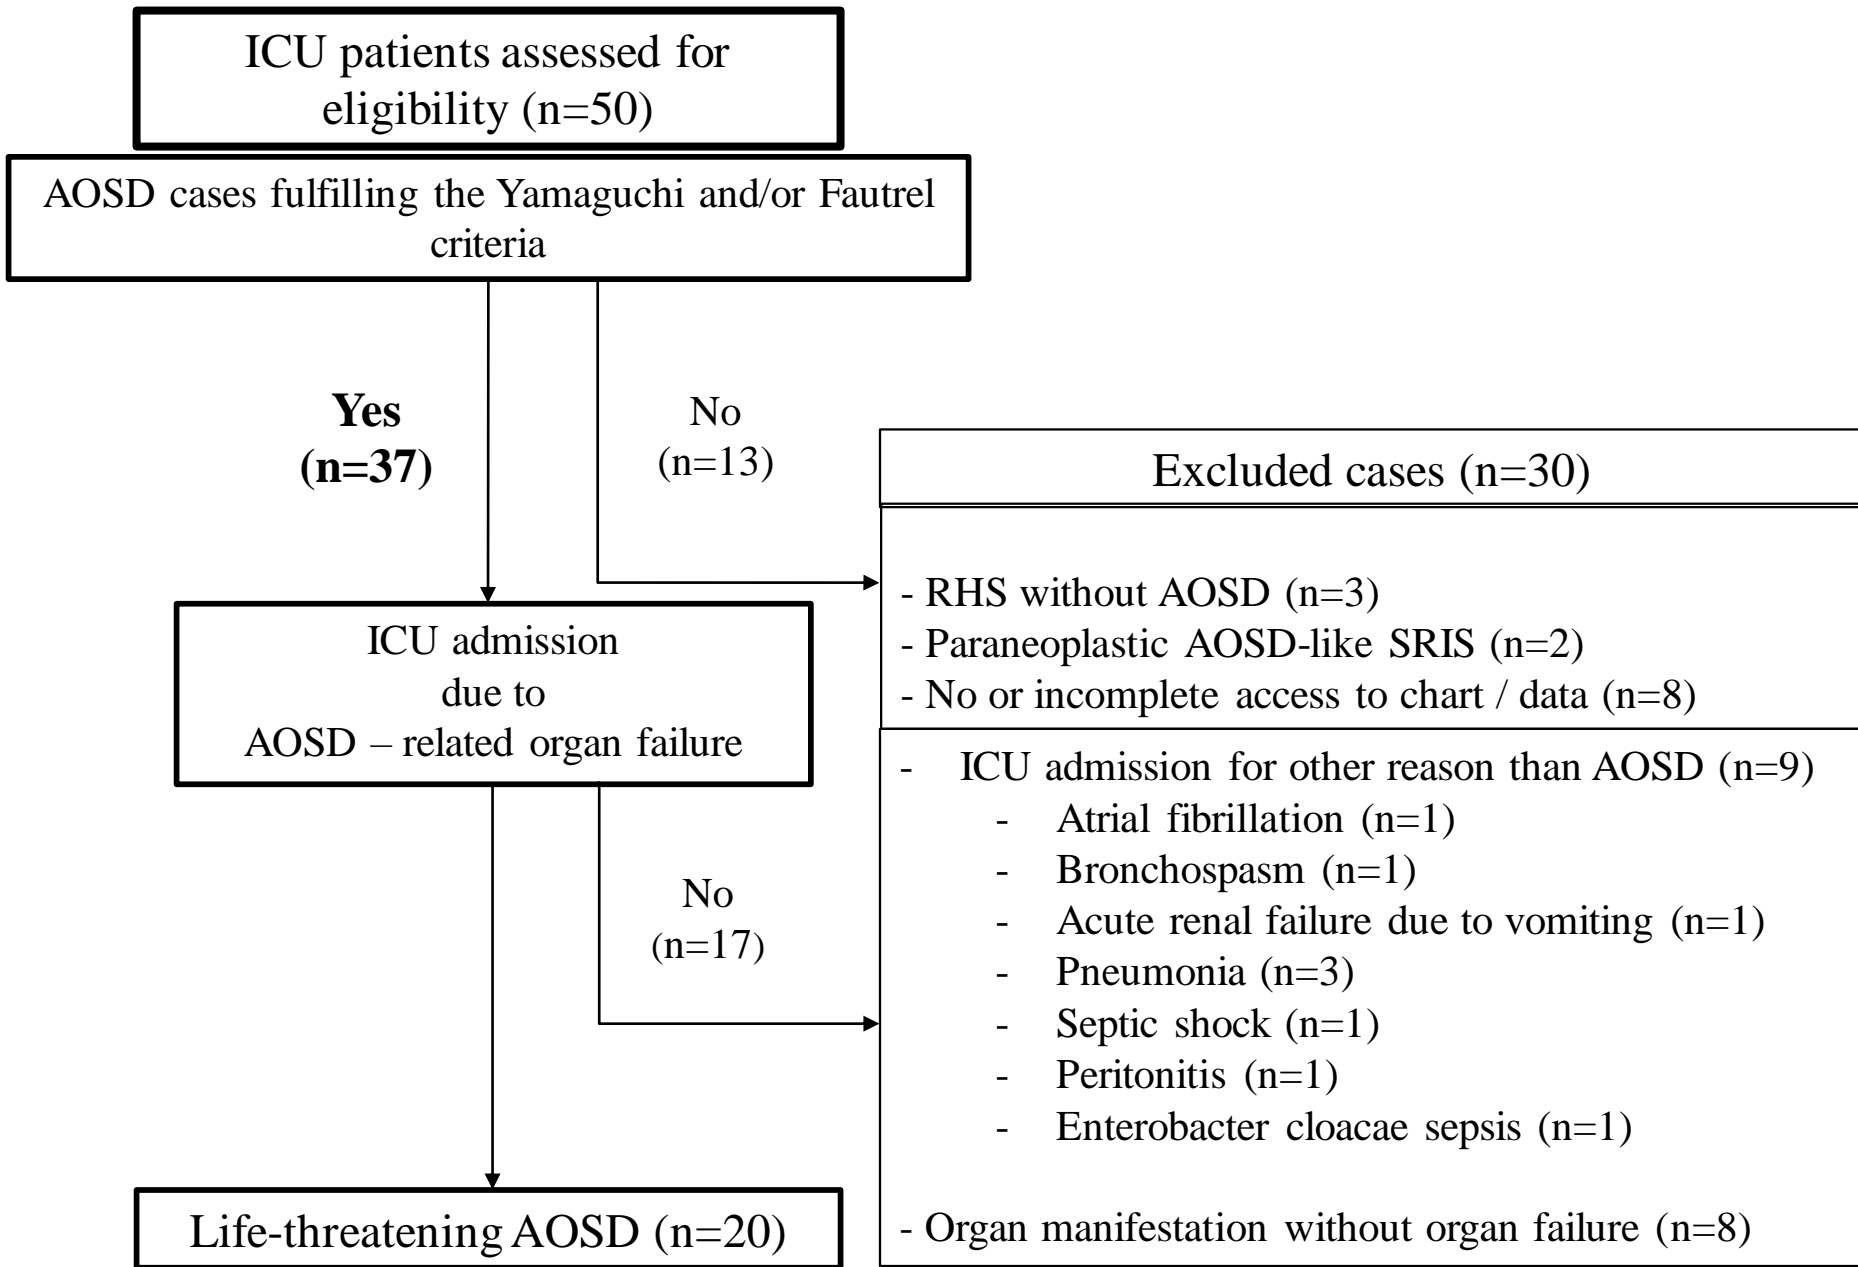

**Flow chart of life-threatening adult onset still disease**

*AOSD : adult onset still disease ; ICU : intensive care unit*
