# Supplementary material for: Diagnostic and management of life-threatening Adult-Onset Still Disease: a French nationwide multicenter study and systematic literature review
Source: PubMed Central journal article supplement (PMC5896069; doi:10.1186/s13054-018-2012-2), 2018-04-11
Supplement: 13054_2018_2012_MOESM4_ESM.pdf [file 13054_2018_2012_MOESM4_ESM.pdf]

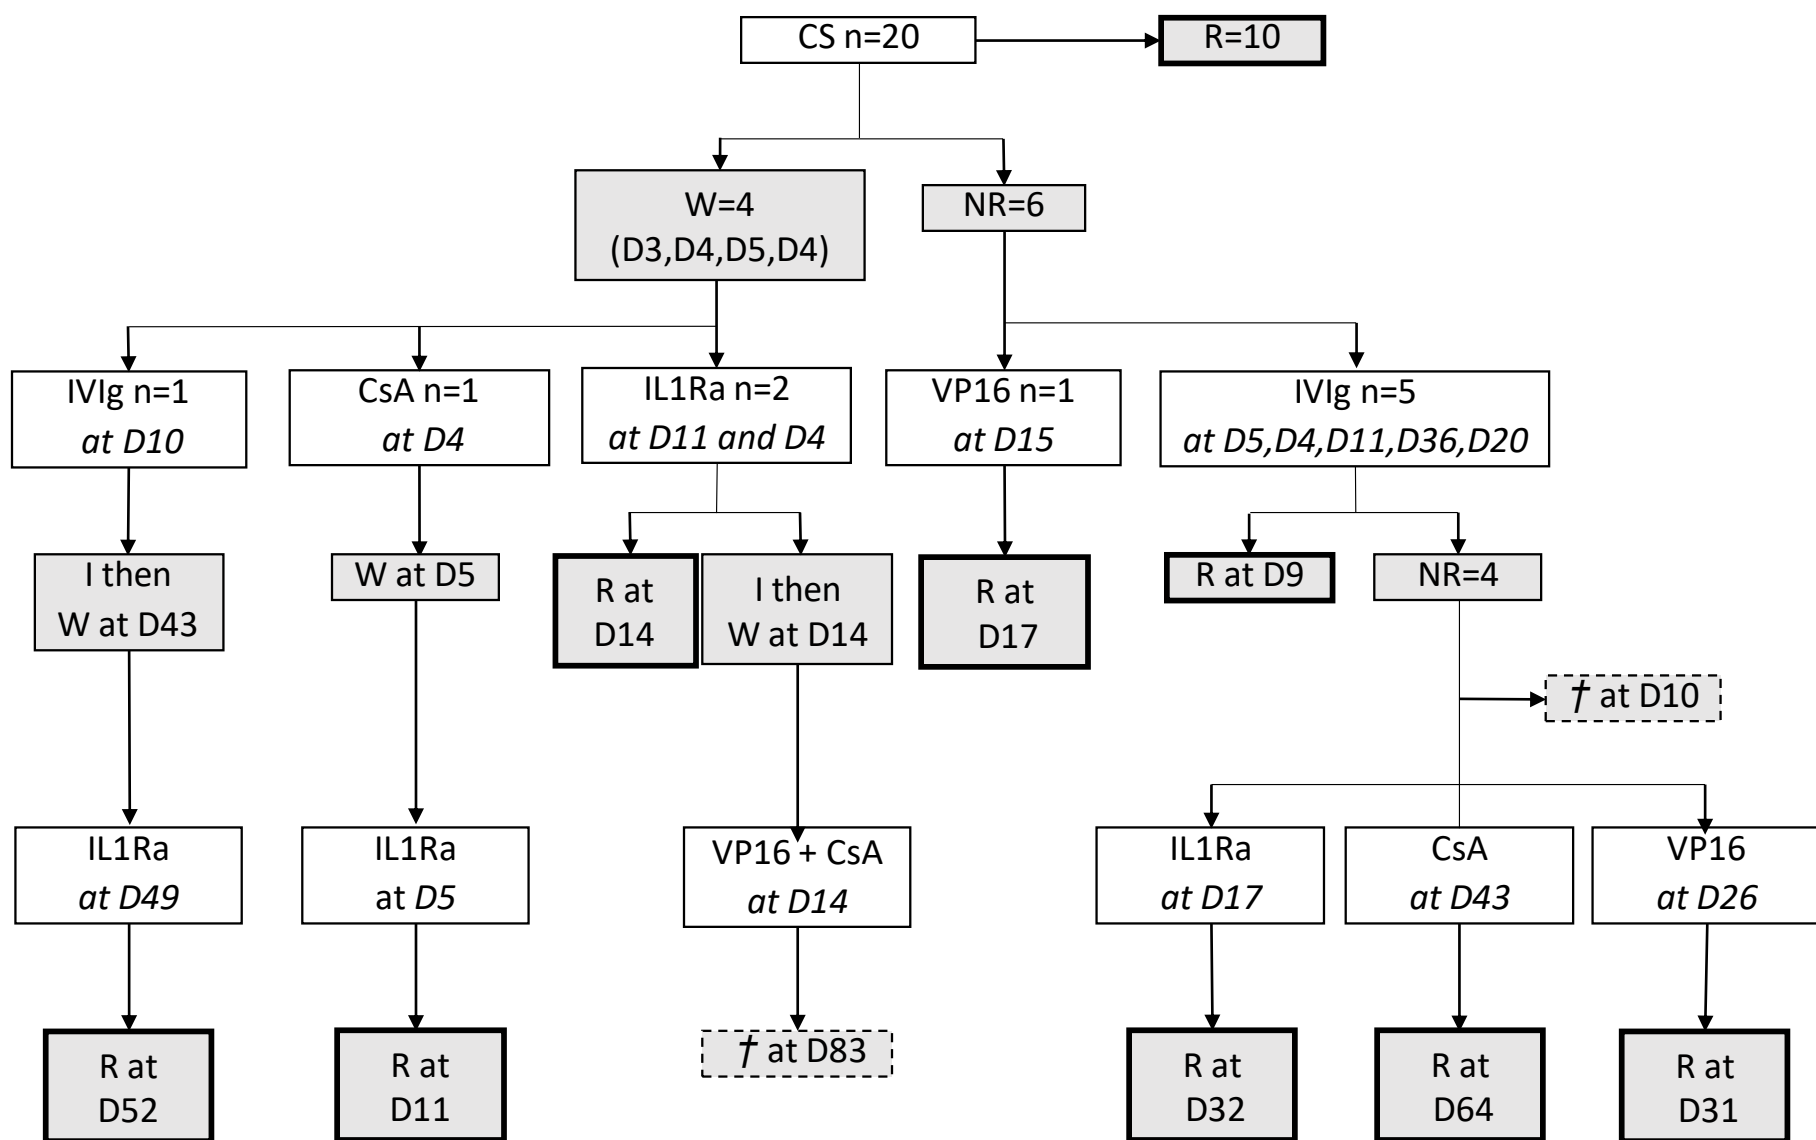

**Treatment of 20 AOSD in the ICU : treatments, timing and outcome.**

*CS : corticosteroids ; CsA : ciclosporin ; D : day ; I : improvement ;*

*IVIgs : intravenous immunoglobulins ; NR : no response ; R : response (ICU discharge) ; VP16 : etoposide ; W : worsening ; † : death.*
