# Supplementary material for: Diagnostic and management of life-threatening Adult-Onset Still Disease: a French nationwide multicenter study and systematic literature review
Source: PubMed Central journal article supplement (PMC5896069; doi:10.1186/s13054-018-2012-2), 2018-04-11
Supplement: 13054_2018_2012_MOESM5_ESM.pdf [file 13054_2018_2012_MOESM5_ESM.pdf]

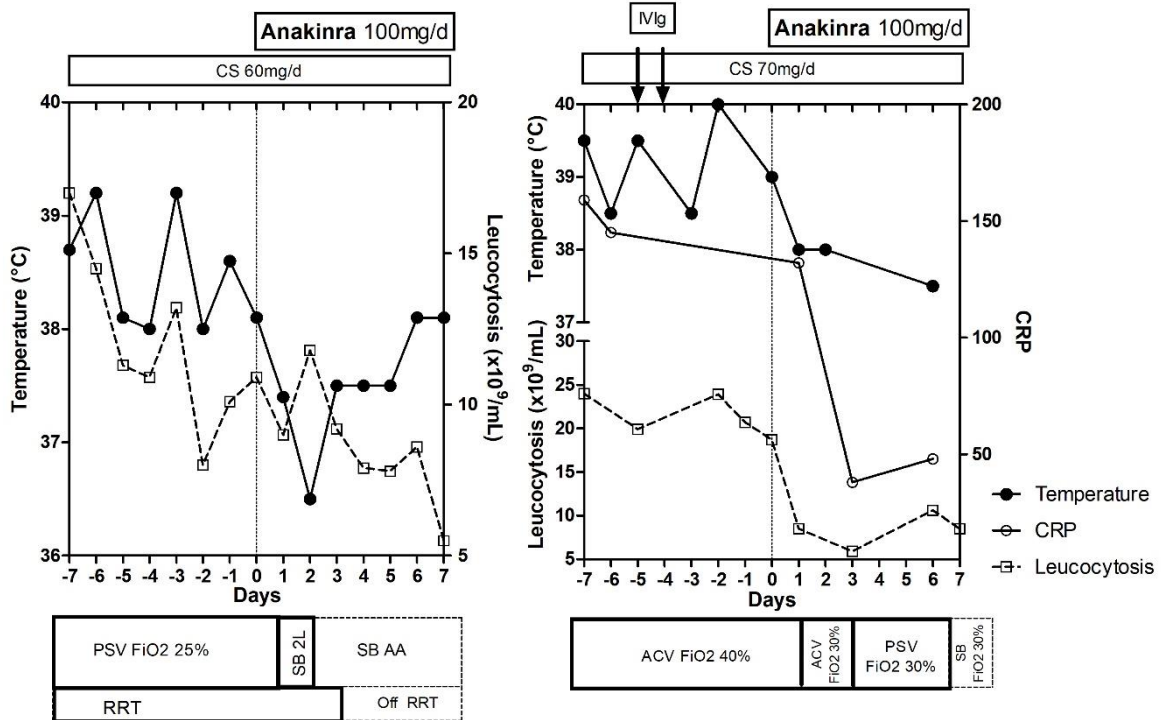

**Example of 2 patients treated by anakinra.**

ACV : assisted controlled ventilation ; CRP : C reactive protein ; CS : corticosteroids ; IVIg : intravenous immunoglobulins ; PSV : pressure support ventilation ; RRT : renal replacement therapy ; SB : spontaneous breathing
